# Supplementary material
Source: PubMed Central journal article supplement (PMC4619189)

Supplemental Digital Content 1

Nomogram for sarcoma-specific death in patients with primary retroperitoneal sarcoma. WD/Myx LPS, well-differentiated and myxoid liposarcomas; DD/RC/Pleo LPS, dedifferentiated, round cell, and pleomorphic liposarcomas and sarcoma not otherwise specified; LMS, leiomyosarcoma; SFT, solitary fibrous tumor; MPNST, malignant peripheral nerve sheath tumor; Other, other soft tissue sarcomas, including translocation-associated sarcomas; DSD, disease specific death.

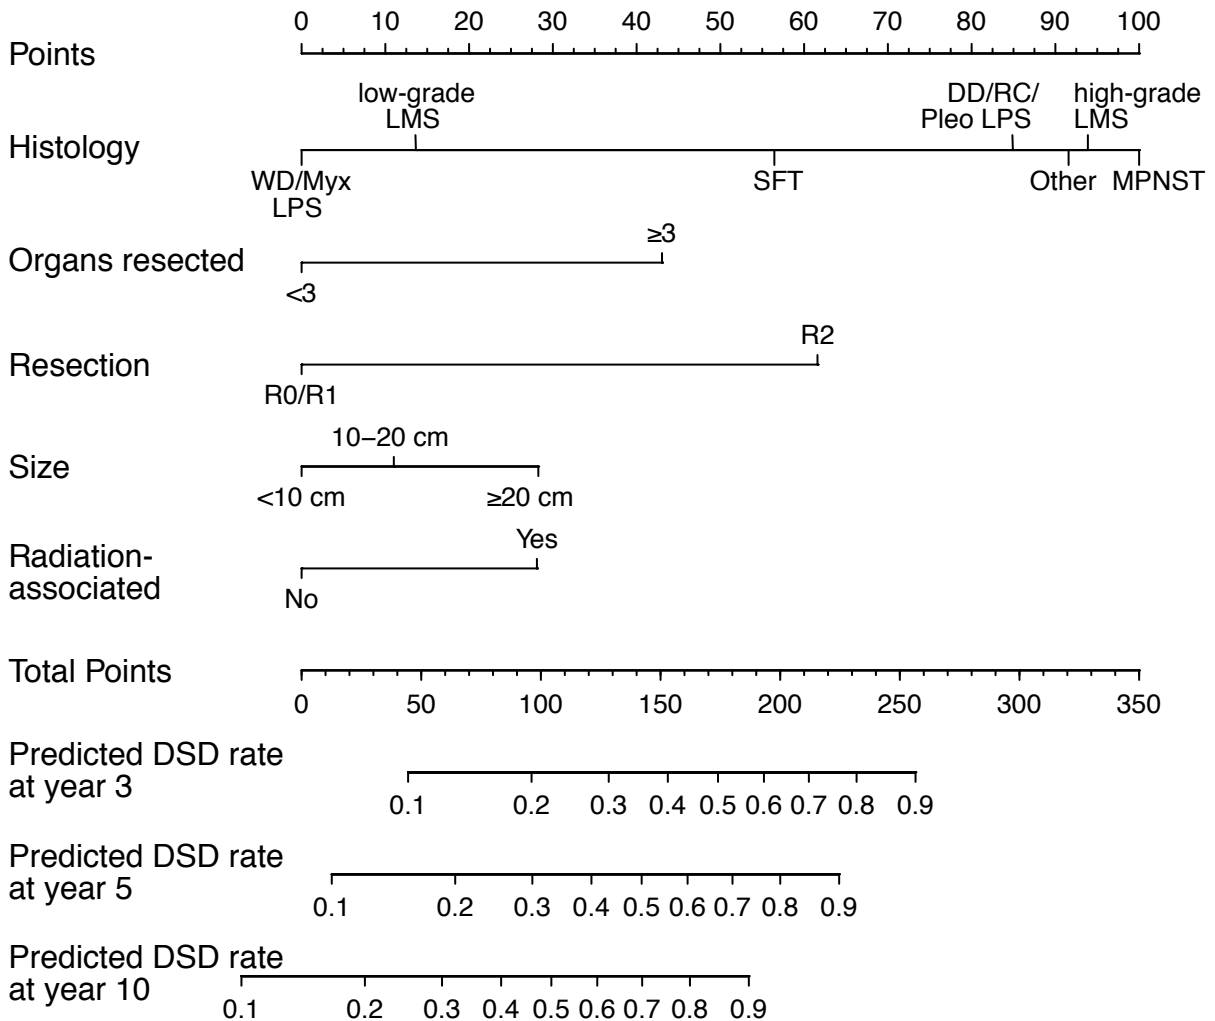

Supplement: NIHMS652904-supplement-Supplementary_Fig_1.pdf [file NIHMS652904-supplement-Supplementary_Fig_1.pdf]
