# Supplementary material
Source: PubMed Central journal article supplement (PMC4619189)

Supplemental Digital Content 2

Nomogram for local recurrence in patients with primary retroperitoneal sarcoma. WD/Myx LPS, well-differentiated and myxoid liposarcomas; DD/RC/Pleo LPS, dedifferentiated, round cell, and pleomorphic liposarcomas and sarcoma not otherwise specified; LMS, leiomyosarcoma; SFT, solitary fibrous tumor; MPNST, malignant peripheral nerve sheath tumor; Other, other soft tissue sarcomas, including translocation-associated sarcomas; LR, local recurrence.

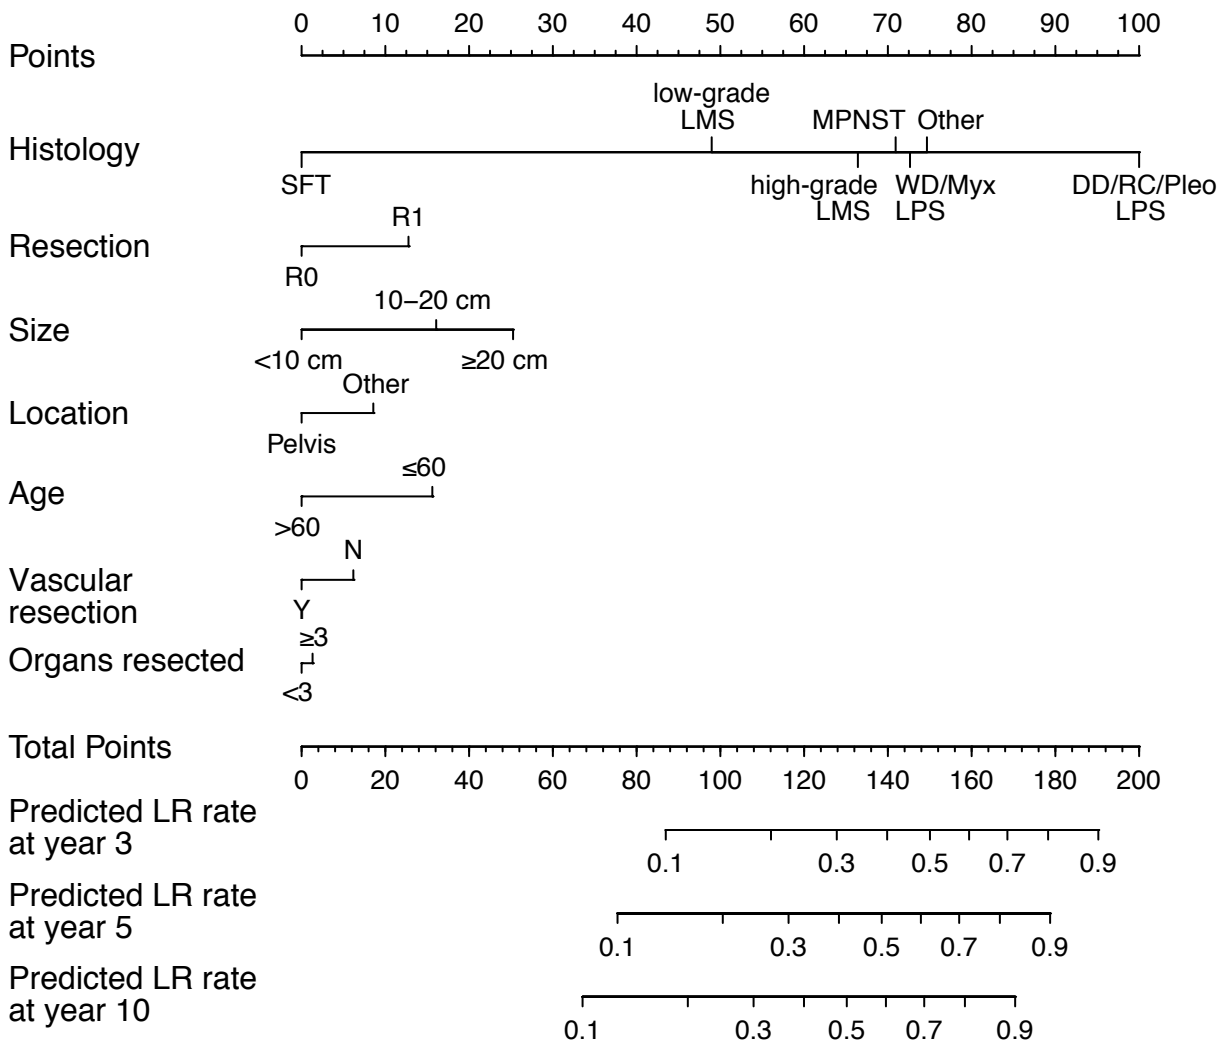

Supplement: NIHMS652904-supplement-Supplementary_Fig_2.pdf [file NIHMS652904-supplement-Supplementary_Fig_2.pdf]
