# Supplementary material
Source: PubMed Central journal article supplement (PMC4619189)

## Supplemental Digital Content 4

Calibration plots for internal validation of the nomograms for (A) sarcoma-specific death, (B) local recurrence, and (C) distant recurrence.

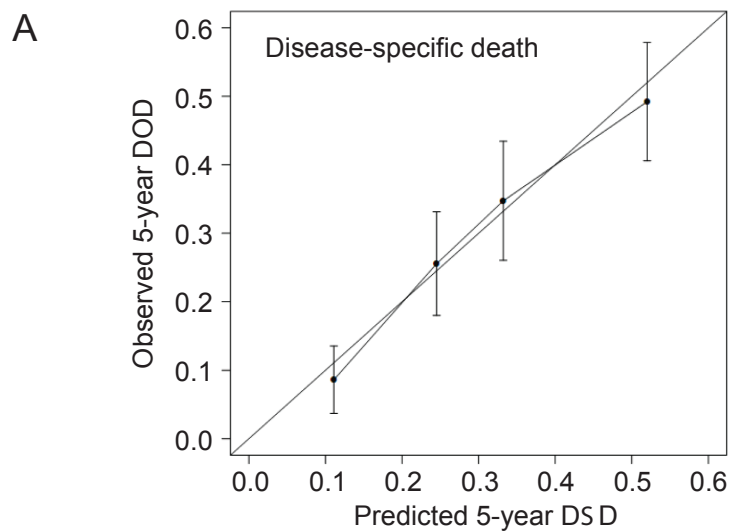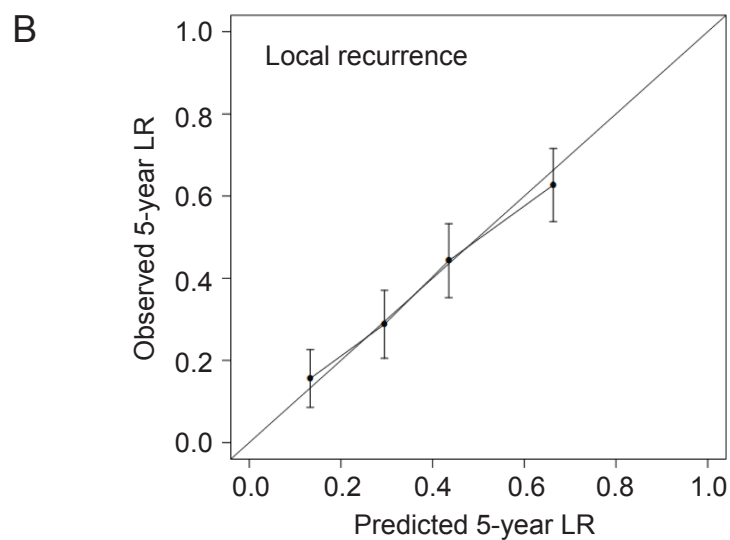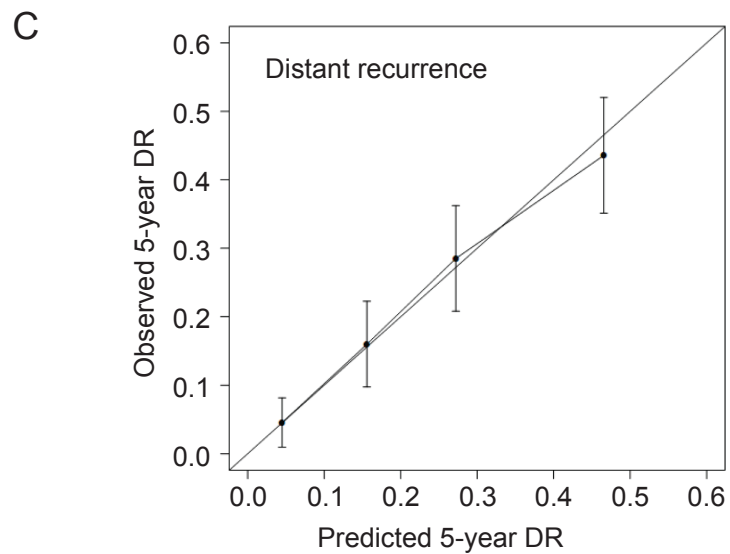

Supplement: NIHMS652904-supplement-Supplementary_Fig_4.pdf [file NIHMS652904-supplement-Supplementary_Fig_4.pdf]
